# Supplementary figures and images for: Sedentary Behavior Impacts on the Epigenome and Transcriptome: Lessons from Muscle Inactivation in Drosophila Larvae
Source: MDPI journal article supplement (doi:10.3390/cells12192333), 2023-09-22

A

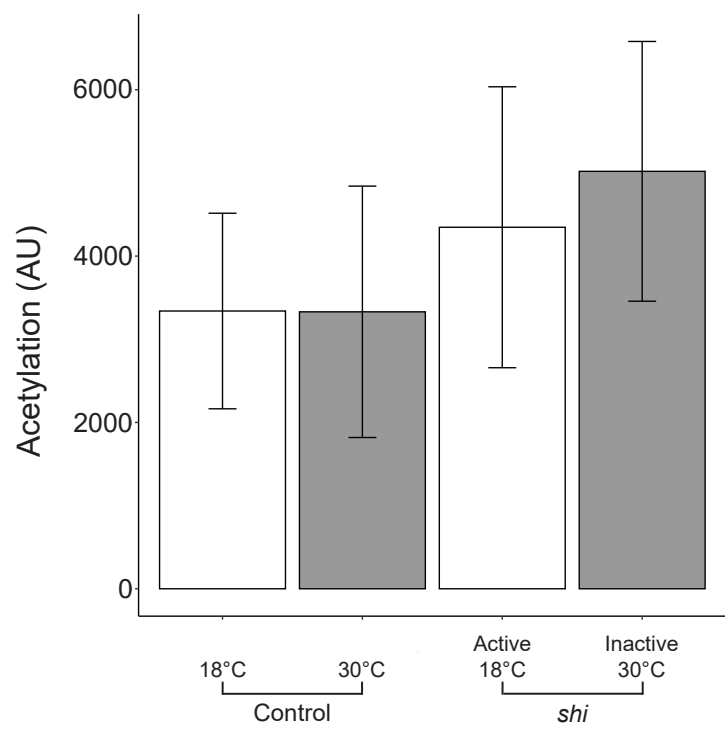

B

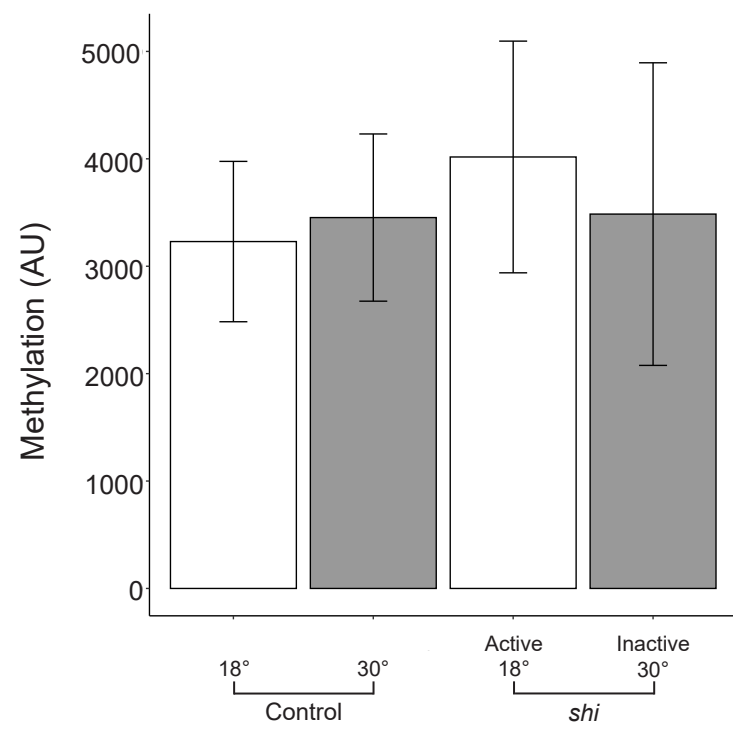

Supplement: s1 [file s1]
